# Supplementary material for: Length Distribution of Ancestral Tracks under a General Admixture Model and Its Applications in Population History Inference
Source: PubMed Central journal article supplement (PMC4730239; doi:10.1038/srep20048), 2016-01-28
Supplement: srep20048-s1.pdf [file srep20048-s1.pdf]

# Supplementary Information for

## Length Distribution of Ancestral Tracks under a General Admixture Model and Its Applications in Population History Inference

Xumin Ni<sup>+</sup>, Xiong Yang<sup>+</sup>, Wei Guo, Kai Yuan, Ying Zhou, Zhiming Ma<sup>\*</sup>, Shuhua Xu<sup>\*</sup>

<sup>\*</sup>Corresponding author. E-mail: xushua@picb.ac.cn (S.X.) and mazm@amt.ac.cn

(Z.M.). <sup>+</sup>These authors contributed equally to this work.

### Supplementary Figure S1

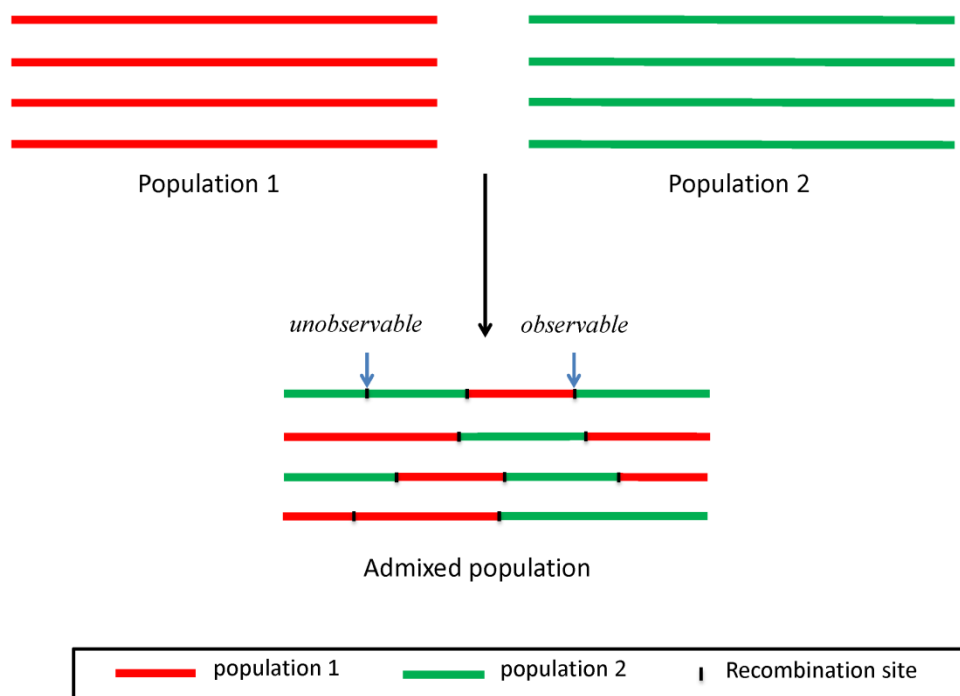

**Fig. S1. Two types of recombination: observable and unobservable recombination.** Recombination among segments from the same ancestry is unobservable recombination, otherwise is observable recombination.

## Supplementary Figure S2

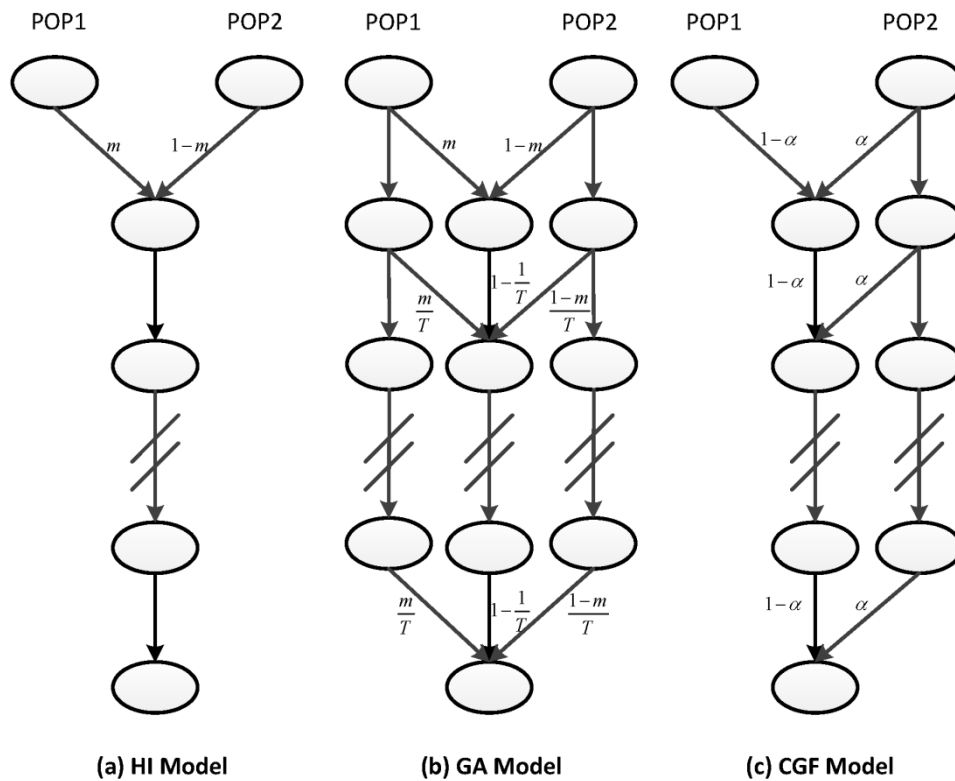

**Fig. S2. Three typical admixture models.** (a): Hybrid isolation (HI) model; (b): Gradual admixture (GA) model; (c): Continuous gene flow (CGF) model. POP1: the reference population one; POP2: the reference population two;  $m$  is proportion of population one and  $\alpha = 1 - m^{1/T}$ .

### Supplementary Figure S3

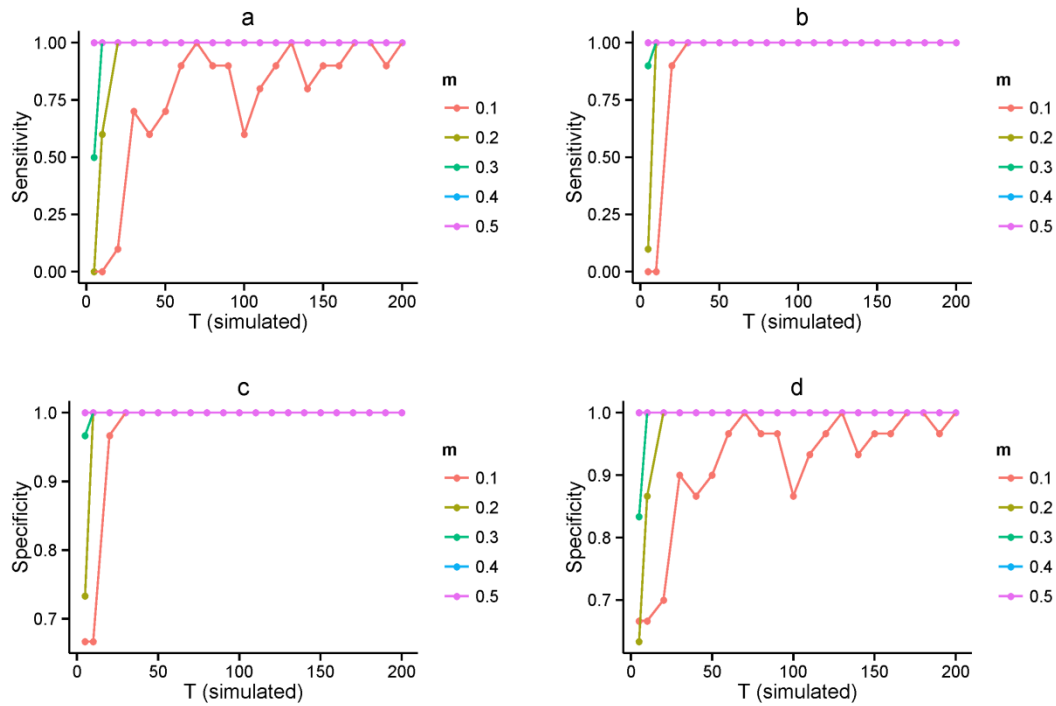

**Fig. S3. The sensitivity and specificity of model selection.** (a): Sensitivity of model selection for GA model; (b): Sensitivity of model selection for CGFR model; (c): Specificity of model selection for HI model; (d): Specificity of model selection for CGFD model. Different colors represent different simulated proportions of population one.

## Supplementary Figure S4

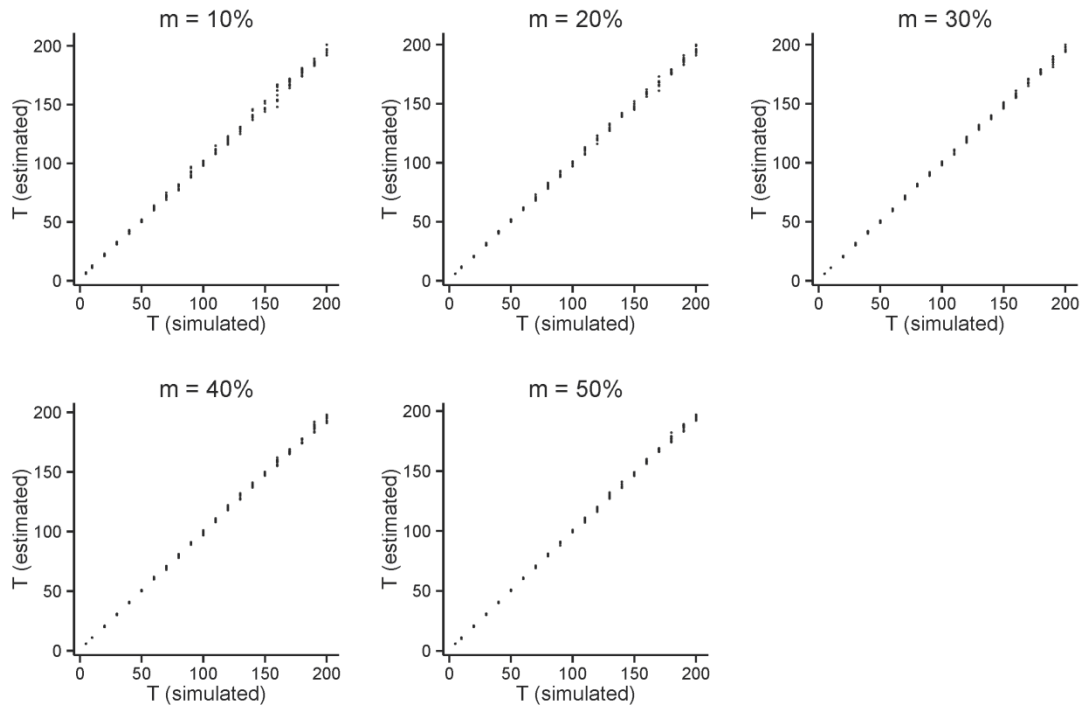

**Fig. S4. Generation estimated for each simulation replicate under HI model.**

## Supplementary Figure S5

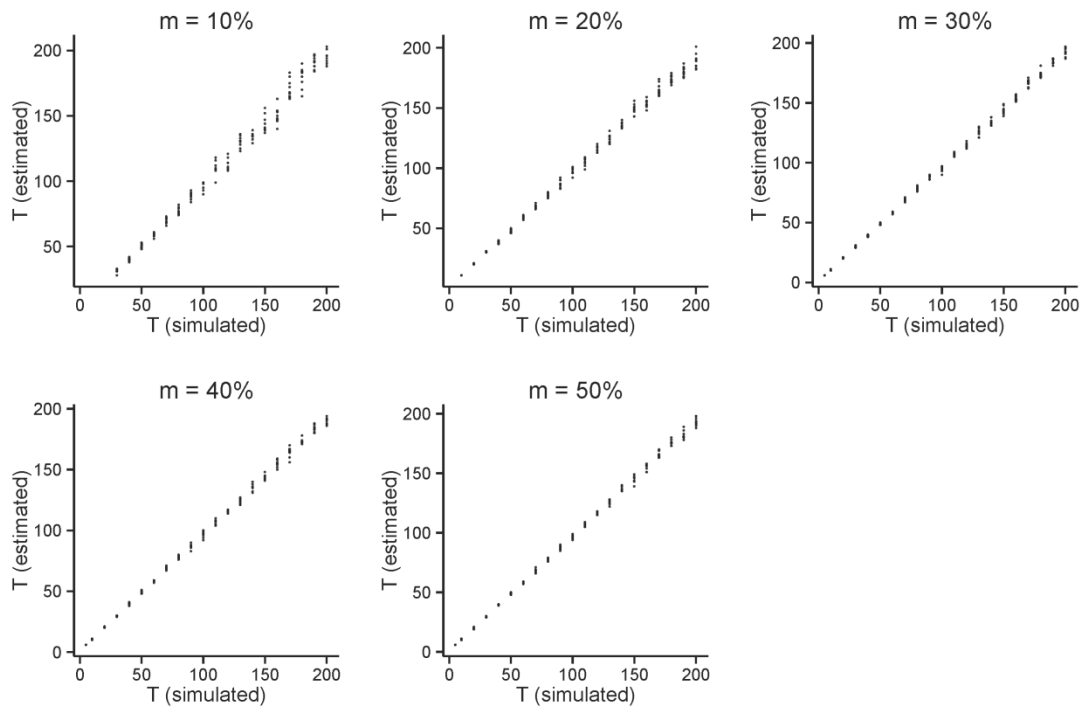

**Fig. S5. Generation estimated for each simulation replicate under GA model.**

## Supplementary Figure S6

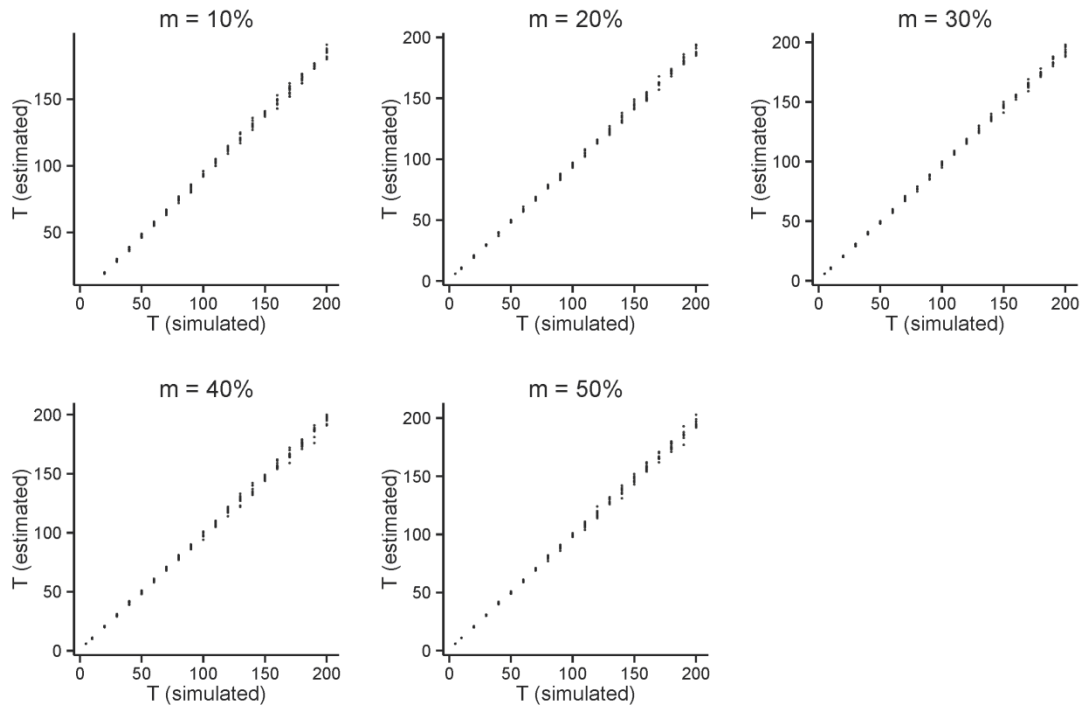

**Fig. S6. Generation estimated for each simulation replicate under CGFR model.**

## Supplementary Figure S7

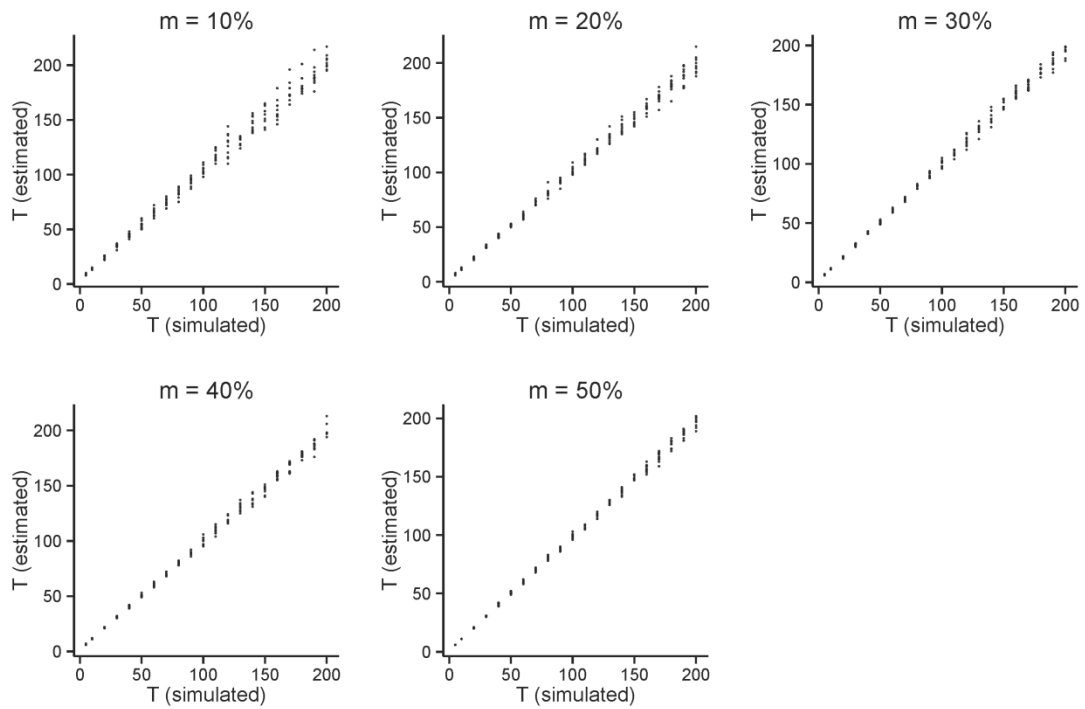

**Fig. S7. Generation estimated for each simulation replicate under CGFD model.**

## Supplementary Figure S8

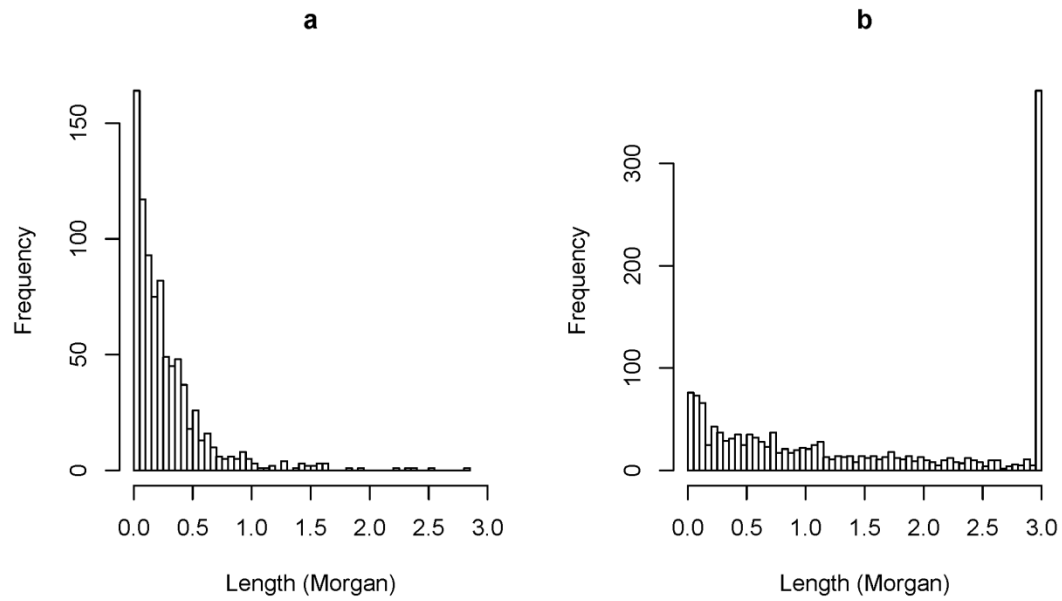

**Fig. S8. Simulated distributions of ancestral tracks in the case of incorrect determination.** (a) and (b) are the empirical distribution of ancestral tracks from population 1 and from population 2, respectively. The simulated model is GA model, admixture proportion and time is 10% and 5 generations, respectively.

## Supplementary Figure S9

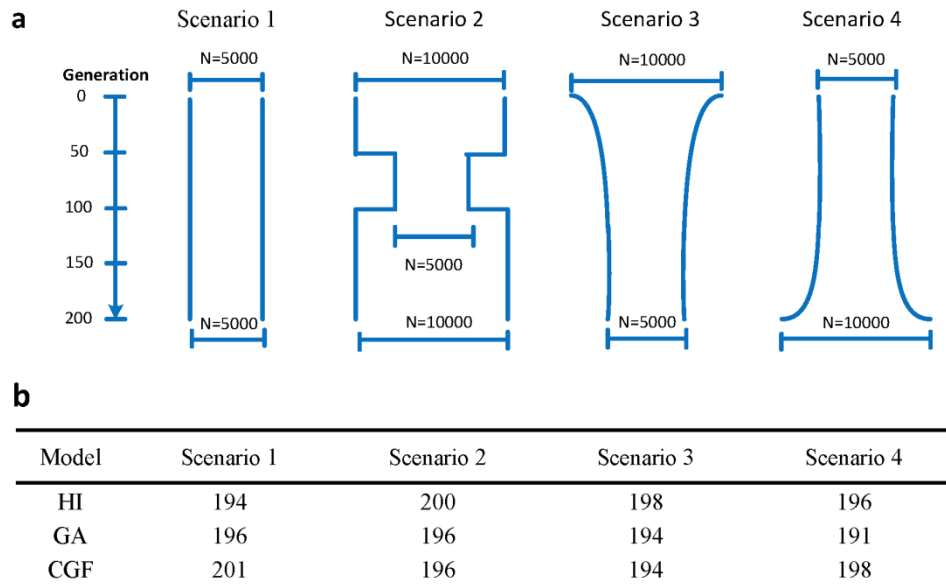

**Fig. S9. Generation estimations under different demographic models. (a):** Four demographic models. Scenario 1: Population with constant size; Scenario 2: Population with bottleneck between 50 and 100 generations; Scenario 3: Population with exponential size expansion; Scenario 3: Population with exponential size reduction.  $N$  is the effective population size. **(b):** Generation estimations under these four Scenarios. The simulated admixture proportion and time is 50% and 200 generations, respectively.

## Supplementary Table S1

| Model       | $T$         |      |      | $m$        | Model       | $T$        |                |
|-------------|-------------|------|------|------------|-------------|------------|----------------|
| (simulated) | (simulated) | POP1 | POP2 | (inferred) | (inferred)  | (inferred) | 95%CI          |
| HI          | 10          | YRI  | CEU  | 0.297787   | HI (100%)   | 10         | [10, 10]       |
| HI          | 20          | YRI  | CEU  | 0.29644    | HI (100%)   | 19.98      | [18.95, 19.01] |
| HI          | 50          | YRI  | CEU  | 0.29517    | HI (100%)   | 43.57      | [43.47, 43.67] |
| HI          | 100         | YRI  | CEU  | 0.295788   | GA (89%)    | 130.3      | [130, 130.5]   |
| GA          | 10          | YRI  | CEU  | 0.300604   | GA (69%)    | 10.12      | [10.04, 10.19] |
| GA          | 20          | YRI  | CEU  | 0.282173   | GA (100%)   | 18.97      | [18.92, 19.02] |
| GA          | 50          | YRI  | CEU  | 0.298265   | GA (100%)   | 40.93      | [40.82, 41.04] |
| GA          | 100         | YRI  | CEU  | 0.296194   | GA (100%)   | 83.6       | [83.43, 83.77] |
| CGFR        | 10          | YRI  | CEU  | 0.303632   | CGFR (85%)  | 10.11      | [10.04, 10.17] |
| CGFR        | 20          | YRI  | CEU  | 0.293441   | CGFR (79%)  | 18.11      | [18.04, 18.19] |
| CGFR        | 50          | YRI  | CEU  | 0.294307   | CGFR (100%) | 42.19      | [42.08, 42.3]  |
| CGFR        | 100         | YRI  | CEU  | 0.304212   | CGFR (100%) | 86.4       | [86.24, 86.56] |
| CGFD        | 10          | CEU  | YRI  | 0.292857   | CGFD (54%)  | 11.94      | [11.86, 12.03] |
| CGFD        | 20          | CEU  | YRI  | 0.305231   | CGFD (93%)  | 20.83      | [20.75, 20.91] |
| CGFD        | 50          | CEU  | YRI  | 0.315461   | CGFD (100%) | 45.38      | [45.26, 45.5]  |
| CGFD        | 100         | CEU  | YRI  | 0.320606   | CGFD (100%) | 106.7      | [106.5, 106.8] |

**Table S1. The estimation result of simulation tracks inferred by HAPMIX.** Model

(simulated): Simulated admixture model;  $T$  (simulated): Simulated admixture time;

POP1: Reference population one; POP2: Reference population two;  $m$  (inferred):



inferred admixture proportion of POP1; Model (inferred): Inferred admixture model, percentage in the parenthesis is the support rate in 100 times bootstrapping;  $T$  (inferred): Inferred admixture time; 95%CI: 95% confidence interval of the estimated admixture time. The simulated proportion of POP1 is 30%.

## Supplementary Text S1. Some detail produces of our method.

### A. Detailed calculation for the length distribution of ancestral tracks under HI, GA and CGF models

For HI model (see Supplementary Fig. S2(a)), the ancestry proportions from population 1 and population 2 at generation  $t$  are

$$m_1(t) = \begin{cases} m, & t = 1 \\ 0, & 2 \leq t \leq T \end{cases} \text{ and } m_2(t) = \begin{cases} 1 - m, & t = 1 \\ 0, & 2 \leq t \leq T \end{cases}$$

From Equation (1) and (2), we can get

$$I(t) = \begin{cases} 0, & t = 1 \\ 1, & 2 \leq t \leq T \end{cases}$$

$$H_1(t) = m \text{ and } H_2(t) = 1 - m, 1 \leq t \leq T.$$

Then we can easily get  $s_i(t)$  from Equation (3) and  $u_i(t)$  from Equation (4),

$$s_1(t) = \begin{cases} m, & t = 1 \\ 0, & 2 \leq t \leq T \end{cases}, s_2(t) = \begin{cases} (1 - m), & t = 1 \\ 0, & 2 \leq t \leq T \end{cases};$$

and

$$u_1(t) = \begin{cases} (1 - m)T, & t = 1 \\ 0, & 2 \leq t \leq T \end{cases}, u_2(t) = \begin{cases} mT, & t = 1 \\ 0, & 2 \leq t \leq T \end{cases}$$

Substituting  $u_i(t)$  and  $s_i(t)$  into the Equation (5), we obtain the length distribution of ancestral tracks from population 1 and population 2 in HI model,

$$f_1(x; m, T) = (1 - m)T e^{-(1-m)Tx},$$

and

$$f_2(x; m, T) = mT e^{-mTx}.$$

The conditional length distribution of ancestral tracks longer than a specific threshold  $C$  is as follows:

$$f_1(x; m, T | x > C) = (1 - m)T e^{-(1-m)T(x-C)},$$

$$f_2(x; m, T | x > C) = mT e^{-mT(x-C)}.$$

We can also get the expectations and variances of the ancestral tracks from Equation (7) and Equation (8),

$$E(X_1) = \frac{1}{(1-m)T}, E(X_2) = \frac{1}{mT};$$

$$Var(X_1) = \frac{1}{(1-m)^2T^2}, Var(X_2) = \frac{1}{m^2T^2}.$$

For GA model (see Supplementary Fig. S2(b)), the ancestry proportions from population 1 and population 2 at generation  $t$  are

$$m_1(t) = \begin{cases} m, & t = 1 \\ m/T, & 2 \leq t \leq T \end{cases} \text{ and } m_2(t) = \begin{cases} 1-m, & t = 1 \\ (1-m)/T, & 2 \leq t \leq T \end{cases}$$

Similarly, we can get  $H_i(t)$ ,  $s_i(t)$  and  $u_i(t)$  as follows,

$$H_1(t) = m, H_2(t) = 1 - m;$$

and

$$s_1(t) = \begin{cases} m \left(1 - \frac{1}{T}\right)^{T-1}, & t = 1 \\ \frac{m}{T} \left(1 - \frac{1}{T}\right)^{T-t}, & 2 \leq t \leq T \end{cases},$$

$$s_2(t) = \begin{cases} (1-m) \left(1 - \frac{1}{T}\right)^{T-1}, & t = 1 \\ \frac{1-m}{T} \left(1 - \frac{1}{T}\right)^{T-t}, & 2 \leq t \leq T \end{cases};$$

and

$$u_1(t) = (T - t + 1)(1 - m), u_2(t) = (T - t + 1)m.$$

The distributions of population 1 and population 2 in GA model are

$$f_1(x; m, T)$$

$$= (1 - m) \left[ \frac{T^2 e^{-T(1-m)x} + \sum_{t=2}^T (T - t + 1)^2 \frac{1}{T} \left(1 - \frac{1}{T}\right)^{1-t} e^{-(T-t+1)(1-m)x}}{T + \sum_{t=2}^T (T - t + 1) \frac{1}{T} \left(1 - \frac{1}{T}\right)^{1-t}} \right],$$

$$f_2(x; m, T) = m \left[ \frac{T^2 e^{-Tmx} + \sum_{t=2}^T (T-t+1)^2 \frac{1}{T} \left(1 - \frac{1}{T}\right)^{1-t} e^{-(T-t+1)mx}}{T + \sum_{t=2}^T (T-t+1) \frac{1}{T} \left(1 - \frac{1}{T}\right)^{1-t}} \right].$$

The conditional length distribution of ancestral tracks longer than a specific threshold

$C$  is as follows:

$$\begin{aligned} f_1(x; m, T | x > C) &= \frac{(1-m) \left[ T^2 e^{-T(1-m)x} + \sum_{t=2}^T (T-t+1)^2 \frac{1}{T} \left(1 - \frac{1}{T}\right)^{1-t} e^{-(T-t+1)(1-m)x} \right]}{T e^{-T(1-m)C} + \sum_{t=2}^T (T-t+1) \frac{1}{T} \left(1 - \frac{1}{T}\right)^{1-t} e^{-(T-t+1)(1-m)C}}, \\ f_2(x; m, T | x > C) &= \frac{m \left[ T^2 e^{-Tmx} + \sum_{t=2}^T (T-t+1)^2 \frac{1}{T} \left(1 - \frac{1}{T}\right)^{1-t} e^{-(T-t+1)mx} \right]}{T e^{-TmC} + \sum_{t=2}^T (T-t+1) \frac{1}{T} \left(1 - \frac{1}{T}\right)^{1-t} e^{-(T-t+1)mC}}. \end{aligned}$$

The expectations and variances of the ancestral tracks are as follows:

$$\begin{aligned} E(X_1) &= \frac{T + \sum_{t=2}^T \left(1 - \frac{1}{T}\right)^{1-t}}{(1-m) \left[ T^2 + \sum_{t=2}^T (T-t+1) \left(1 - \frac{1}{T}\right)^{1-t} \right]}, \\ E(X_2) &= \frac{T + \sum_{t=2}^T \left(1 - \frac{1}{T}\right)^{1-t}}{m \left[ T^2 + \sum_{t=2}^T (T-t+1) \left(1 - \frac{1}{T}\right)^{1-t} \right]}, \\ \text{Var}(X_1) &= \frac{1}{(1-m)^2} \left[ \frac{2 \left( 1 + \sum_{t=2}^T \frac{\left(1 - \frac{1}{T}\right)^{1-t}}{T-t+1} \right)}{T^2 + \sum_{t=2}^T (T-t+1) \left(1 - \frac{1}{T}\right)^{1-t}} - \left( \frac{T + \sum_{t=2}^T \left(1 - \frac{1}{T}\right)^{1-t}}{T^2 + \sum_{t=2}^T (T-t+1) \left(1 - \frac{1}{T}\right)^{1-t}} \right)^2 \right], \\ \text{Var}(X_2) &= \frac{1}{m^2} \left[ \frac{2 \left( 1 + \sum_{t=2}^T \frac{\left(1 - \frac{1}{T}\right)^{1-t}}{T-t+1} \right)}{T^2 + \sum_{t=2}^T (T-t+1) \left(1 - \frac{1}{T}\right)^{1-t}} - \left( \frac{T + \sum_{t=2}^T \left(1 - \frac{1}{T}\right)^{1-t}}{T^2 + \sum_{t=2}^T (T-t+1) \left(1 - \frac{1}{T}\right)^{1-t}} \right)^2 \right]. \end{aligned}$$

For CGF model (see Supplementary Fig. S2(c)), the ancestry proportions from population 1 and population 2 at generation  $t$  are

$$m_1(t) = \begin{cases} 1 - \alpha, & t = 1 \\ 0, & 2 \leq t \leq T \end{cases} \text{ and } m_2(t) = \alpha, 1 \leq t \leq T.$$

where  $\alpha = 1 - m^{1/T}$ . Then

$$H_1(t) = (1 - \alpha)^t, H_2(t) = 1 - (1 - \alpha)^t;$$

and

$$s_1(t) = \begin{cases} m, & t = 1 \\ 0, & 2 \leq t \leq T \end{cases}$$

$$s_2(t) = \alpha(1 - \alpha)^{T-t} = (1 - m^{1/T})m^{(T-t)/T};$$

and

$$u_1(t) = \sum_{k=t}^T (1 - (1 - \alpha)^k) = (T - t + 1) - \frac{m^{t/T} - m^{(T+1)/T}}{1 - m^{1/T}},$$

$$u_2(t) = \sum_{k=t}^T (1 - \alpha)^k = \frac{m^{t/T} - m^{(T+1)/T}}{1 - m^{1/T}}.$$

Then the distribution of ancestral tracks in CGF model is as follows:

$$f_1(x; m, T) = \left( T - \frac{(1 - m)m^{1/T}}{1 - m^{1/T}} \right) e^{-\left( T - \frac{(1 - m)m^{1/T}}{1 - m^{1/T}} \right) x},$$

$$f_2(x; m, T) = \frac{\sum_{t=1}^T m^{-t/T} (m^{t/T} - m^{(T+1)/T})^2 e^{-\left( \frac{m^{t/T} - m^{(T+1)/T}}{1 - m^{1/T}} \right) x}}{\sum_{t=1}^T (1 - m^{(T+1-t)/T})(1 - m^{1/T})}.$$

The conditional length distribution of ancestral tracks longer than a specific threshold

$C$  is as follows:

$$f_1(x; m, T | x > C) = \left( T - \frac{(1 - m)m^{1/T}}{1 - m^{1/T}} \right) e^{-\left( T - \frac{(1 - m)m^{1/T}}{1 - m^{1/T}} \right) (x - C)},$$

$$f_2(x; m, T) = \frac{(1 - m^{1/T}) \sum_{t=1}^T m^{-t/T} (m^{t/T} - m^{(T+1)/T})^2 e^{-\left( \frac{m^{t/T} - m^{(T+1)/T}}{1 - m^{1/T}} \right) x}}{\sum_{t=1}^T m^{-t/T} (m^{t/T} - m^{(T+1)/T}) e^{-\left( \frac{m^{t/T} - m^{(T+1)/T}}{1 - m^{1/T}} \right) C}}.$$

The expectations and variances of the ancestral tracks are as follows:

$$E(X_1) = \frac{(1 - m^{1/T})}{T(1 - m^{1/T}) - (1 - m)m^{1/T}},$$

$$E(X_2) = \frac{(1-m)}{m} \frac{(1-m^{1/T})}{T(1-m^{1/T}) - (1-m)m^{1/T}};$$

$$\text{Var}(X_1) = \left( \frac{(1-m^{1/T})}{T(1-m^{1/T}) - (1-m)m^{1/T}} \right)^2,$$

$$\text{Var}(X_2) = \frac{2(1-m^{1/T})^3 \sum_{t=1}^T \frac{m^{-t/T}}{m^{t/T} - m^{(T+1)/T}}}{T(1-m^{1/T}) - (1-m)m^{1/T}} - \left( \frac{(1-m)(1-m^{1/T})}{mT(1-m^{1/T}) - m(1-m)m^{1/T}} \right)^2.$$

## B. The proof of Equation (17)

When the number of the ancestry populations  $K$  is 2, Equation (17) is always true.

Proof: In order to prove

$$\frac{E(X_1)}{E(X_2)} = \frac{m}{1-m},$$

we need to prove

$$\frac{\frac{\sum_{t=1}^T s_1(t)}{\sum_{t=1}^T u_1(t)s_1(t)}}{\frac{\sum_{t=1}^T s_2(t)}{\sum_{t=1}^T u_2(t)s_2(t)}} = \frac{m}{1-m}.$$

We note that  $\sum_{t=1}^T s_1(t) = m$  and  $\sum_{t=1}^T s_2(t) = 1-m$ , thus the problem turns into

proving

$$\sum_{t=1}^T u_1(t)s_1(t) = \sum_{t=1}^T u_2(t)s_2(t).$$

Substituting Equation (3) and Equation (4) into the above Equation, we can get

$$\begin{aligned}
\sum_{t=1}^T u_1(t) s_1(t) &= \sum_{t=1}^T \sum_{k=t}^T (1 - H_1(k)) m_1(t) \left( \prod_{l=t+1}^T I(l) \right) \\
&= \sum_{t=1}^T \sum_{k=t}^T H_2(k) m_1(t) \left( \prod_{l=t+1}^T I(l) \right) \\
&= \sum_{k=1}^T \sum_{t=1}^k H_2(k) m_1(t) \left( \prod_{l=t+1}^T I(l) \right) \\
&= \sum_{k=1}^T \sum_{s=1}^k m_2(s) \left( \prod_{l=s+1}^k I(l) \right) \sum_{t=1}^k m_1(t) \left( \prod_{l=t+1}^T I(l) \right) \\
&= \sum_{k=1}^T \sum_{s=1}^k H_1(k) m_2(s) \left( \prod_{l=s+1}^T I(l) \right) = \sum_{t=1}^T u_2(t) s_2(t).
\end{aligned}$$

### C. Detail of Bootstrapping Procedures

Let  $n$  be the number of bootstrapping,  $p$  be the proportion of tracks sampled in each bootstrapping repeat,  $\alpha$  be the significance level to compute confidence interval, and  $N_i$  be the total number of tracks from  $i$ -th ancestral population.

1) For each bootstrapping replicate, we sample  $pN_i$  tracks from  $i$ -th ancestral population, and combine them as the new dataset to select the optimal model and estimate the corresponding admixture time with the procedures described in Materials and Methods;

2) At the end of bootstrapping, the optimal model of the highest number of occurrence (o) is chosen as the bootstrapped optimal model, then the supporting rate is  $\frac{o}{n} \times 100\%$ ;

3) We define a set  $A$  as all the admixture times under the bootstrapped optimal model, then we regard the mean time  $\bar{T}$  as the bootstrapped estimator of the admixture time,

$$\bar{T} = \frac{1}{|A|} \sum_{T \in A} T,$$

where  $|A|$  is the number of elements of  $A$ .

4) Since the variance is unknown, we calculate the confidence interval of the admixture time with significance level  $\alpha$  as:

$$\left[ \bar{T} - \frac{S}{\sqrt{|A|}} t_{\alpha/2}(|A| - 1), \bar{T} + \frac{S}{\sqrt{|A|}} t_{\alpha/2}(|A| - 1) \right],$$

where  $S^2 = \frac{1}{|A|-1} \sum_{T \in A} (T - \bar{T})^2$ .



## **Supplementary Data Legends**

**Data S1. Detailed parameters of admixture model for simulation 1.** Sheet 1: Simulation 1A; Sheet 2: Simulation 1B; Sheet 3: Simulation 1C; Sheet 4: Simulation 1D.

**Data S2. Details of parameters estimation and model selection of 1050 simulation replicates under HI model.** Sheet 1: The summary of time estimated of all cases. Sheet 1: Admixture proportion is 10%; Sheet 2: Admixture proportion is 20%; Sheet 3: Admixture proportion is 30%; Sheet 4: Admixture proportion is 40%; Sheet 5: Admixture proportion is 50%.

**Data S3. Details of parameters estimation and model selection of 1050 simulation replicates under GA model.** Sheet 1: The summary of time estimated of all cases. Sheet 1: Admixture proportion is 10%; Sheet 2: Admixture proportion is 20%; Sheet 3: Admixture proportion is 30%; Sheet 4: Admixture proportion is 40%; Sheet 5: Admixture proportion is 50%.

**Data S4. Details of parameters estimation and model selection of 1050 simulation replicates under CGF (population 1 as recipient) model.** Sheet 1: The summary of time estimated of all cases. Sheet 1: Admixture proportion is 10%; Sheet 2: Admixture proportion is 20%; Sheet 3: Admixture proportion is 30%; Sheet 4: Admixture proportion is 40%; Sheet 5: Admixture proportion is 50%.

**Data S5. Details of parameters estimation and model selection of 1050 simulation replicates under CGF (population 1 as donor) model.** Sheet 1: The summary of

time estimated of all cases. Sheet 1: Admixture proportion is 10%; Sheet 2: Admixture proportion is 20%; Sheet 3: Admixture proportion is 30%; Sheet 4: Admixture proportion is 40%; Sheet 5: Admixture proportion is 50%.

**Data S6. Summary of simulations whose model was incorrectly determined.**

Model (simulated) and Model (inferred) are the simulated and inferred admixture model, respectively.  $m$  (simulated) and  $m$  (inferred) are the simulated and inferred admixture proportion, respectively.  $T$  (simulated) and  $T$  (inferred) the simulated and inferred admixture time, respectively.

**Data S7. The probability  $p$  of ancestral tracks whose length are longer than a specific threshold  $C$  under different admixture time and proportions.** Sheet 1:  $C=0.5cM$ ; Sheet 2:  $C=1cM$ ; Sheet 3:  $C=1.5cM$ ; Sheet 4:  $C=2cM$ .  $T$ : the admixture time;  $m$ : the admixture proportion;  $p$ : the the probability of ancestral tracks larger than a specific threshold  $C$ .
